# Supplementary material for: An inflammation-induced mechanism for leukocyte transmigration across lymphatic vessel endothelium
Source: PubMed Central journal article supplement — J Exp Med. 2006 Nov 27;203(12):2763–77. doi: 10.1084/jem.20051759 (PMC2118156; doi:10.1084/jem.20051759), 2006-11-27
Supplement: jexpmed_jem.20051759_9.pdf [file jexpmed_jem.20051759_9.pdf]

**Table S1.** Affymetrix U133 Plus 2.0 GeneChip array data showing transcripts in HDLECs up- or down-regulated by a factor of at least twofold ( $P < 0.1$ ) after stimulation with TNF- $\alpha$ .

| Probe set ID | Gene title                                                                            | Gene symbol | Chromosomal location | Fold up-regulation |
|--------------|---------------------------------------------------------------------------------------|-------------|----------------------|--------------------|
| 205476_at    | chemokine (C-C motif) ligand 20                                                       | CCL20       | 2q33-q37             | 444.3              |
| 215101_s_at  | chemokine (C-X-C motif) ligand 5                                                      | CXCL5       | 4q12-q13             | 390.3              |
| 214974_x_at  | chemokine (C-X-C motif) ligand 5                                                      | CXCL5       | 4q12-q13             | 387.7              |
| 203868_s_at  | vascular cell adhesion molecule 1                                                     | VCAM1       | 1p32-p31             | 214.1              |
| 201641_at    | bone marrow stromal cell antigen 2                                                    | BST2        | 19p13.2              | 180.2              |
| 206211_at    | selectin E (endothelial adhesion molecule 1)                                          | SELE        | 1q22-q25             | 160.4              |
| 204439_at    | interferon-induced protein 44-like                                                    | IFI44L      | 1p31.1               | 149.6              |
| 208747_s_at  | complement component 1, s subcomponent                                                | C1S         | 12p13                | 137.8              |
| 204994_at    | myxovirus (influenza virus) resistance 2 (mouse)                                      | MX2         | 21q22.3              | 99.22              |
| 214574_x_at  | leukocyte specific transcript 1                                                       | LST1        | 6p21.3               | 88.3               |
| 211582_x_at  | leukocyte specific transcript 1                                                       | LST1        | 6p21.3               | 86.6               |
| 214181_x_at  | leukocyte specific transcript 1                                                       | LST1        | 6p21.3               | 80.53              |
| 1553293_at   | G protein-coupled receptor MRGX3                                                      | MRGX3       | 11p15.1              | 79.96              |
| 1555229_a_at | complement component 1, s subcomponent                                                | C1S         | 12p13                | 76.55              |
| 235229_at    | PREDICTED: Homo sapiens similar to Olfactory receptor 2I2 (LOC442197), mRNA           |             |                      | 75.87              |
| 226702_at    | hypothetical protein LOC129607                                                        | LOC129607   | 2p25.2               | 75.85              |
| 205890_s_at  | ubiquitin D                                                                           | UBD         | 6p21.3               | 73.63              |
| 212067_s_at  | complement component 1, r subcomponent                                                | C1R         | 12p13                | 71.05              |
| 238531_x_at  | PREDICTED: Homo sapiens similar to Olfactory receptor 2I2 (LOC442197), mRNA           |             |                      | 49.58              |
| 204655_at    | chemokine (C-C motif) ligand 5                                                        | CCL5        | 17q11.2-q12          | 47.68              |
| 227609_at    | epithelial stromal interaction 1 (breast)                                             | EPSTI1      | 13q13.3              | 43.72              |
| 203153_at    | interferon-induced protein with tetratricopeptide repeats 1                           | IFIT1       | 10q25-q26            | 39.31              |
| 214022_s_at  | interferon induced transmembrane protein 1 (9-27)                                     | IFITM1      | 11p15.5              | 38.05              |
| 209774_x_at  | chemokine (C-X-C motif) ligand 2                                                      | CXCL2       | 4q21                 | 37.68              |
| 1405_i_at    | chemokine (C-C motif) ligand 5                                                        | CCL5        | 17q11.2-q12          | 37.08              |
| 207536_s_at  | tumor necrosis factor receptor superfamily, member 9                                  | TNFRSF9     | 1p36                 | 34.55              |
| 212942_s_at  | KIAA1199                                                                              | KIAA1199    | 15q24                | 30.84              |
| 210538_s_at  | baculoviral IAP repeat-containing 3                                                   | BIRC3       | 11q22                | 30                 |
| 202086_at    | myxovirus (influenza virus) resistance 1, interferon-inducible protein p78 (mouse)    | MX1         | 21q22.3              | 29.87              |
| 1554997_a_at | prostaglandin-endoperoxide synthase 2 (prostaglandin G/H synthase and cyclooxygenase) | PTGS2       | 1q25.2-q25.3         | 29.52              |
| 202357_s_at  | B-factor, properdin                                                                   | BF          | 6p21.3               | 28.46              |
| 204924_at    | toll-like receptor 2                                                                  | TLR2        | 4q32                 | 26.09              |
| 207339_s_at  | lymphotoxin beta (TNF                                                                 | LTB         | 6p21.3               | 23.05              |

|             |                                                                                                          |              |              |       |
|-------------|----------------------------------------------------------------------------------------------------------|--------------|--------------|-------|
| 238629_x_at | superfamily, member 3)<br>PREDICTED: Homo sapiens similar to Olfactory receptor 2I2<br>(LOC442197), mRNA |              |              | 22.84 |
| 204415_at   | interferon, alpha-inducible protein<br>(clone IFI-6-16)                                                  | G1P3         | 1p35         | 22.73 |
| 202411_at   | interferon, alpha-inducible protein<br>27                                                                | IFI27        | 14q32        | 22.61 |
| 215223_s_at | superoxide dismutase 2,<br>mitochondrial                                                                 | SOD2         | 6q25.3       | 20.43 |
| 227393_at   | tumor protein p53 inducible<br>protein 5                                                                 | TP53I5       | 11p15.5      | 19.75 |
| 823_at      | chemokine (C-X3-C motif) ligand<br>1                                                                     | CX3CL1       | 16q13        | 18.32 |
| 219352_at   | hect domain and RLD 6                                                                                    | HERC6        | 4q22.1       | 18.2  |
| 205207_at   | interleukin 6 (interferon, beta 2)                                                                       | IL6          | 7p21         | 17.67 |
| 219424_at   | Epstein-Barr virus induced gene 3                                                                        | EBI3         | 19p13.3      | 17.54 |
| 214453_s_at | interferon-induced protein 44                                                                            | IFI44        | 1p31.1       | 17.44 |
| 202643_s_at | tumor necrosis factor, alpha-<br>induced protein 3                                                       | TNFAIP<br>3  | 6q23         | 17.13 |
| 205599_at   | TNF receptor-associated factor 1                                                                         | TRAF1        | 9q33-q34     | 16.6  |
| 206027_at   | S100 calcium binding protein A3                                                                          | S100A3       | 1q21         | 16.18 |
| 204972_at   | 2'-5'-oligoadenylate synthetase 2,<br>69/71kDa                                                           | OAS2         | 12q24.2      | 15.7  |
| 227677_at   | Janus kinase 3 (a protein tyrosine<br>kinase, leukocyte)                                                 | JAK3         | 19p13.1      | 15.35 |
| 218400_at   | 2'-5'-oligoadenylate synthetase 3,<br>100kDa                                                             | OAS3         | 12q24.2      | 15    |
| 216841_s_at | superoxide dismutase 2,<br>mitochondrial                                                                 | SOD2         | 6q25.3       | 14.34 |
| 204748_at   | prostaglandin-endoperoxide<br>synthase 2 (prostaglandin G/H<br>synthase and cyclooxygenase)              | PTGS2        | 1q25.2-q25.3 | 14.23 |
| 202644_s_at | tumor necrosis factor, alpha-<br>induced protein 3                                                       | TNFAIP<br>3  | 6q23         | 13.34 |
| 235276_at   |                                                                                                          |              |              | 13.25 |
| 221477_s_at | hypothetical protein MGC5618                                                                             | MGC561<br>8  |              | 10.61 |
| 209417_s_at | interferon-induced protein 35                                                                            | IFI35        | 17q21        | 10.43 |
| 200923_at   | lectin, galactoside-binding,<br>soluble, 3 binding protein                                               | LGALS3<br>BP | 17q25        | 10.33 |
| 202295_s_at | cathepsin H                                                                                              | CTSH         | 15q24-q25    | 9.888 |
| 212977_at   | chemokine orphan receptor 1                                                                              | CMKOR<br>1   | 2q37.3       | 9.155 |
| 235609_at   | BRCA1 interacting protein C-<br>terminal helicase 1                                                      | BRIP1        | 17q22-q24    | 9.063 |
| 204128_s_at | replication factor C (activator 1) 3,<br>38kDa                                                           | RFC3         | 13q12.3-q13  | 8.893 |
| 206082_at   | HLA complex P5                                                                                           | HCP5         | 6p21.3       | 8.702 |
| 230499_at   | Baculoviral IAP repeat-containing<br>3                                                                   | BIRC3        | 11q22        | 8.63  |
| 205483_s_at | interferon, alpha-inducible protein<br>(clone IFI-15K)                                                   | G1P2         | 1p36.33      | 8.594 |
| 204502_at   | SAM domain and HD domain 1                                                                               | SAMHD<br>1   | 20pter-q12   | 8.458 |
| 1555464_at  | interferon induced with helicase C<br>domain 1                                                           | IFIH1        | 2p24.3-q24.3 | 8.434 |
| 219209_at   | interferon induced with helicase C<br>domain 1                                                           | IFIH1        | 2p24.3-q24.3 | 8.362 |
| 205552_s_at | 2',5'-oligoadenylate synthetase 1,                                                                       | OAS1         | 12q24.1      | 8.315 |

|              |                                                                                                       |               |               |       |
|--------------|-------------------------------------------------------------------------------------------------------|---------------|---------------|-------|
|              | 40/46kDa                                                                                              |               |               |       |
| 230966_at    | interleukin 4 induced 1                                                                               | IL4I1         | 19q13.3-q13.4 | 8.249 |
| 210145_at    | phospholipase A2, group IVA<br>(cytosolic, calcium-dependent)                                         | PLA2G4<br>A   | 1q25          | 8.062 |
| 205046_at    | centromere protein E, 312kDa                                                                          | CENPE         | 4q24-q25      | 8.023 |
| 234987_at    | SAM domain and HD domain 1                                                                            | SAMHD<br>1    | 20pter-q12    | 7.951 |
| 215485_s_at  | intercellular adhesion molecule 1<br>(CD54), human rhinovirus<br>receptor                             | ICAM1         | 19p13.3-p13.2 | 7.695 |
| 232504_at    | hypothetical protein LOC285628                                                                        | LOC285<br>628 | 5q34          | 7.685 |
| 202637_s_at  | intercellular adhesion molecule 1<br>(CD54), human rhinovirus<br>receptor                             | ICAM1         | 19p13.3-p13.2 | 7.601 |
| 221900_at    | collagen, type VIII, alpha 2                                                                          | COL8A2        | 1p34.2        | 7.598 |
| 213599_at    | Opa interacting protein 5                                                                             | OIP5          | 15q15.1       | 7.563 |
| 217767_at    | complement component 3                                                                                | C3            | 19p13.3-p13.2 | 7.47  |
| 214913_at    | a disintegrin-like and<br>metalloprotease (reprolysin type)<br>with thrombospondin type 1 motif,<br>3 | ADAMT<br>S3   | 4q13.3        | 7.363 |
| 202869_at    | 2',5'-oligoadenylate synthetase 1,<br>40/46kDa                                                        | OAS1          | 12q24.1       | 7.344 |
| 202638_s_at  | intercellular adhesion molecule 1<br>(CD54), human rhinovirus<br>receptor                             | ICAM1         | 19p13.3-p13.2 | 7.29  |
| 207992_s_at  | adenosine monophosphate<br>deaminase (isoform E)                                                      | AMPD3         | 11p15         | 7.114 |
| 220565_at    | chemokine (C-C motif) receptor<br>10                                                                  | CCR10         | 17q21.1-q21.3 | 7.076 |
| 216598_s_at  | chemokine (C-C motif) ligand 2                                                                        | CCL2          | 17q11.2-q21.1 | 7.034 |
| 219990_at    | FLJ23311 protein                                                                                      | FLJ2331<br>1  | 11p15.1       | 6.993 |
| 202270_at    | guanylate binding protein 1,<br>interferon-inducible, 67kDa                                           | GBP1          | 1p22.2        | 6.916 |
| 222549_at    | claudin 1                                                                                             | CLDN1         | 3q28-q29      | 6.749 |
| 209464_at    | aurora kinase B                                                                                       | AURKB         | 17p13.1       | 6.554 |
| 201422_at    |                                                                                                       |               |               | 6.552 |
| 204146_at    | RAD51 associated protein 1                                                                            | RAD51         | 12p13.2-p13.1 | 6.517 |
| 228281_at    | hypothetical protein FLJ25416                                                                         | FLJ2541<br>6  | 11q14.1       | 6.511 |
| 210652_s_at  | chromosome 1 open reading frame<br>34                                                                 | C1orf34       | 1p32.3        | 6.308 |
| 205733_at    | Bloom syndrome                                                                                        | BLM           | 15q26.1       | 6.304 |
| 205691_at    | synaptogyrin 3                                                                                        | SYNGR<br>3    | 16p13         | 6.126 |
| 202901_x_at  | cathepsin S                                                                                           | CTSS          | 1q21          | 6.063 |
| 1554768_a_at | MAD2 mitotic arrest deficient-like<br>1 (yeast)                                                       | MAD2L<br>1    | 4q27          | 6.046 |
| 1554696_s_at | thymidylate synthetase                                                                                | TYMS          | 18p11.32      | 5.924 |
| 205844_at    | vanin 1                                                                                               | VNN1          | 6q23-q24      | 5.92  |
| 223381_at    | cell division cycle associated 1                                                                      | CDCA1         | 1q23.3        | 5.821 |
| 203828_s_at  | interleukin 32                                                                                        | IL32          | 16p13.3       | 5.774 |
| 235529_x_at  | SAM domain and HD domain 1                                                                            | SAMHD<br>1    | 20pter-q12    | 5.739 |
| 214398_s_at  | inhibitor of kappa light<br>polypeptide gene enhancer in B-                                           | IKBKE         | 1q32.1        | 5.658 |

|             |                                                                                                    |               |                    |       |
|-------------|----------------------------------------------------------------------------------------------------|---------------|--------------------|-------|
| 206632_s_at | cells, kinase epsilon<br>apolipoprotein B mRNA editing<br>enzyme, catalytic polypeptide-like<br>3B | APOBE<br>C3B  | 22q13.1-q13.2      | 5.612 |
| 221530_s_at | basic helix-loop-helix domain<br>containing, class B, 3                                            | BHLHB<br>3    | 12p11.23-<br>p12.1 | 5.596 |
| 238327_at   | similar to MGC52679 protein                                                                        | LOC440<br>836 | 22q13.33           | 5.57  |
| 204709_s_at | kinesin family member 23                                                                           | KIF23         | 15q23              | 5.456 |
| 224753_at   | cell division cycle associated 5                                                                   | CDCA5         | 11q12.1            | 5.411 |
| 222868_s_at | interleukin 18 binding protein                                                                     | IL18BP        | 11q13              | 5.39  |
| 236045_x_at | LOC441801                                                                                          |               | 17p13.3            | 5.35  |
| 235964_x_at | SAM domain and HD domain 1                                                                         | SAMHD<br>1    | 20pter-q12         | 5.334 |
| 228975_at   | Sp6 transcription factor                                                                           | SP6           | 17q21.32           | 5.241 |
| 213906_at   | v-myb myeloblastosis viral<br>oncogene homolog (avian)-like 1                                      | MYBL1         | 8q22               | 5.17  |
| 204174_at   | arachidonate 5-lipoxygenase-<br>activating protein                                                 | ALOX5<br>AP   | 13q12              | 5.156 |
| 220975_s_at | C1q and tumor necrosis factor<br>related protein 1                                                 | C1QTNF<br>1   | 17q25.3            | 5.146 |
| 209642_at   | BUB1 budding uninhibited by<br>benzimidazoles 1 homolog (yeast)                                    | BUB1          | 2q14               | 5.107 |
| 221521_s_at | DNA replication complex GINS<br>protein PSF2                                                       | Pfs2          | 16q24.1            | 5.032 |
| 236641_at   | Kinesin family member 14                                                                           | KIF14         | 1pter-q31.3        | 5.003 |
| 203765_at   | grancalcin, EF-hand calcium<br>binding protein                                                     | GCA           | 2q24.2             | 4.942 |
| 202902_s_at | cathepsin S                                                                                        | CTSS          | 1q21               | 4.932 |
| 218943_s_at | DEAD (Asp-Glu-Ala-Asp) box<br>polypeptide 58                                                       | DDX58         | 9p12               | 4.92  |
| 221258_s_at | kinesin family member 18A                                                                          | KIF18A        | 11p14.1            | 4.862 |
| 210260_s_at | tumor necrosis factor, alpha-<br>induced protein 8                                                 | TNFAIP<br>8   | 5q23.1             | 4.831 |
| 242560_at   | Fanconi anemia, complementation<br>group D2                                                        | FANCD<br>2    | 3p26               | 4.78  |
| 219593_at   | solute carrier family 15, member 3                                                                 | SLC15A<br>3   | 11q12.2            | 4.765 |
| 226051_at   | selenoprotein M                                                                                    | SELM          | 22q12.2            | 4.763 |
| 225847_at   | arylacetamide deacetylase-like 1                                                                   | AADAC<br>L1   | 3q26.31            | 4.746 |
| 217967_s_at | chromosome 1 open reading frame<br>24                                                              | C1orf24       | 1q25               | 4.733 |
| 210285_x_at | Wilms tumor 1 associated protein                                                                   | WTAP          | 6q25-q27           | 4.681 |
| 219869_s_at | solute carrier family 39 (zinc<br>transporter), member 8                                           | SLC39A<br>8   | 4q22-q24           | 4.649 |
| 241031_at   | Nuclear localized factor 1                                                                         | NLF1          | 15q22.2            | 4.622 |
| 227262_at   | hyaluronan and proteoglycan link<br>protein 3                                                      | HAPLN<br>3    | 15q26.1            | 4.62  |
| 223220_s_at | poly (ADP-ribose) polymerase<br>family, member 9                                                   | PARP9         | 3q13-q21           | 4.616 |
| 239979_at   | Epithelial stromal interaction 1<br>(breast)                                                       | EPSTI1        | 13q13.3            | 4.542 |
| 203927_at   | nuclear factor of kappa light<br>polypeptide gene enhancer in B-<br>cells inhibitor, epsilon       | NFKBIE        | 6p21.1             | 4.518 |
| 203967_at   | CDC6 cell division cycle 6<br>homolog (S. cerevisiae)                                              | CDC6          | 17q21.3            | 4.485 |
| 212619_at   | KIAA0286 protein                                                                                   | KIAA02        | 12q13.3            | 4.462 |

|             |                                                                                                                                    |              |                     |       |
|-------------|------------------------------------------------------------------------------------------------------------------------------------|--------------|---------------------|-------|
| 205205_at   | v-rel reticuloendotheliosis viral oncogene homolog B, nuclear factor of kappa light polypeptide gene enhancer in B-cells 3 (avian) | 86<br>RELB   | 19q13.31-<br>q13.32 | 4.441 |
| 1553141_at  | hypothetical protein FLJ38725                                                                                                      | FLJ3872<br>5 | 13q14.11            | 4.437 |
| 203137_at   | Wilms tumor 1 associated protein                                                                                                   | WTAP         | 6q25-q27            | 4.4   |
| 227764_at   | hypothetical protein MGC52057                                                                                                      | MGC520<br>57 | 2q23.3              | 4.381 |
| 204858_s_at | endothelial cell growth factor 1 (platelet-derived)                                                                                | ECGF1        | 22q13 22q13.3<br>3  | 4.367 |
| 203362_s_at | MAD2 mitotic arrest deficient-like 1 (yeast)                                                                                       | MAD2L<br>1   | 4q27                | 4.296 |
| 202660_at   | Inositol 1,4,5-triphosphate receptor, type 2                                                                                       | ITPR2        | 12p11               | 4.29  |
| 225436_at   | hypothetical protein from EUROIMAGE 588495                                                                                         | LOC584<br>89 | 15q25.1             | 4.29  |
| 215870_s_at | phospholipase A2, group V                                                                                                          | PLA2G5       | 1p36-p34            | 4.284 |
| 208368_s_at | breast cancer 2, early onset                                                                                                       | BRCA2        | 13q12.3             | 4.28  |
| 223556_at   | helicase, lymphoid-specific                                                                                                        | HELLS        | 10q24.2             | 4.222 |
| 215509_s_at | BUB1 budding uninhibited by benzimidazoles 1 homolog (yeast)                                                                       | BUB1         | 2q14                | 4.191 |
| 203145_at   | sperm associated antigen 5                                                                                                         | SPAG5        | 17q11.2             | 4.183 |
| 204825_at   | maternal embryonic leucine zipper kinase                                                                                           | MELK         | 9p13.2              | 4.177 |
| 220085_at   | helicase, lymphoid-specific                                                                                                        | HELLS        | 10q24.2             | 4.163 |
| 204127_at   | replication factor C (activator 1) 3, 38kDa                                                                                        | RFC3         | 13q12.3-q13         | 4.111 |
| 208296_x_at | tumor necrosis factor, alpha-induced protein 8                                                                                     | TNFAIP<br>8  | 5q23.1              | 4.086 |
| 202661_at   | inositol 1,4,5-triphosphate receptor, type 2                                                                                       | ITPR2        | 12p11               | 4.073 |
| 204126_s_at | CDC45 cell division cycle 45-like ( <i>S. cerevisiae</i> )                                                                         | CDC45L       | 22q11.21            | 4.064 |
| 219148_at   | PDZ binding kinase                                                                                                                 | PBK          | 8p21.2              | 4.025 |
| 204549_at   | inhibitor of kappa light polypeptide gene enhancer in B-cells, kinase epsilon                                                      | IKBKE        | 1q32.1              | 4.016 |
| 213008_at   | hypothetical protein FLJ10719                                                                                                      | FLJ1071<br>9 | 15q25-q26           | 3.991 |
| 203560_at   | gamma-glutamyl hydrolase (conjugase, foylpolypolygammaglutamyl hydrolase)                                                          | GGH          | 8q12.3              | 3.959 |
| 236099_at   | Transcribed locus                                                                                                                  |              |                     | 3.959 |
| 222848_at   | leucine zipper protein FKSG14                                                                                                      | FKSG14       | 5p15.2-q12.3        | 3.956 |
| 204887_s_at | polo-like kinase 4 ( <i>Drosophila</i> )                                                                                           | PLK4         | 4q27-q28            | 3.951 |
| 202145_at   | lymphocyte antigen 6 complex, locus E                                                                                              | LY6E         | 8q24.3              | 3.829 |
| 203968_s_at | CDC6 cell division cycle 6 homolog ( <i>S. cerevisiae</i> )                                                                        | CDC6         | 17q21.3             | 3.803 |
| 213112_s_at | sequestosome 1                                                                                                                     | SQSTM<br>1   | 5q35                | 3.798 |
| 226456_at   | hypothetical protein MGC24665                                                                                                      | MGC246<br>65 | 16p13.13            | 3.783 |
| 202307_s_at | transporter 1, ATP-binding cassette, sub-family B (MDR/TAP)                                                                        | TAP1         | 6p21.3              | 3.775 |

|              |                                                                                          |          |               |       |
|--------------|------------------------------------------------------------------------------------------|----------|---------------|-------|
| 217299_s_at  | Nijmegen breakage syndrome 1 (nibrin)                                                    | NBS1     | 8q21          | 3.75  |
| 213007_at    | hypothetical protein FLJ10719                                                            | FLJ10719 | 15q25-q26     | 3.738 |
| 208436_s_at  | interferon regulatory factor 7                                                           | IRF7     | 11p15.5       | 3.719 |
| 244033_at    |                                                                                          |          |               | 3.706 |
| 1559051_s_at | chromosome 6 open reading frame 150                                                      | C6orf150 | 6q13          | 3.705 |
| 225282_at    | hypothetical protein AL133206                                                            | LOC64744 | 1p35.3-p34.1  | 3.7   |
| 204768_s_at  | flap structure-specific endonuclease 1                                                   | FEN1     | 11q12         | 3.693 |
| 209716_at    | colony stimulating factor 1 (macrophage)                                                 | CSF1     | 1p21-p13      | 3.688 |
| 220987_s_at  | chromosome 11 open reading frame 17                                                      | C11orf17 | 11p15.3       | 3.678 |
| 218810_at    | MCP-1 treatment-induced protein                                                          | MCPIP    | 1p34.3        | 3.678 |
| 207196_s_at  | TNFAIP3 interacting protein 1                                                            | TNIP1    | 5q32-q33.1    | 3.66  |
| 205909_at    | polymerase (DNA directed), epsilon 2 (p59 subunit)                                       | POLE2    | 14q21-q22     | 3.63  |
| 204575_s_at  | matrix metalloproteinase 19                                                              | MMP19    | 12q14         | 3.629 |
| 232617_at    | cathepsin S                                                                              | CTSS     | 1q21          | 3.621 |
| 224428_s_at  | cell division cycle associated 7                                                         | CDCA7    | 2q31          | 3.619 |
| 218986_s_at  | hypothetical protein FLJ20035                                                            | FLJ20035 | 4q32.3        | 3.593 |
| 204279_at    | proteasome (prosome, macropain) subunit, beta type, 9 (large multifunctional protease 2) | PSMB9    | 6p21.3        | 3.585 |
| 221703_at    | BRCA1 interacting protein C-terminal helicase 1                                          | BRIP1    | 17q22-q24     | 3.549 |
| 205076_s_at  | myotubularin related protein 11                                                          | MTMR11   | 1q12-q21      | 3.527 |
| 222150_s_at  | hypothetical protein LOC54103                                                            | LOC54103 | 7q11.23       | 3.518 |
| 204510_at    | CDC7 cell division cycle 7 (S. cerevisiae)                                               | CDC7     | 1p22          | 3.515 |
| 216020_at    | Interferon induced with helicase C domain 1                                              | IFIH1    | 2p24.3-q24.3  | 3.515 |
| 202906_s_at  | Nijmegen breakage syndrome 1 (nibrin)                                                    | NBS1     | 8q21          | 3.507 |
| 242890_at    | Helicase, lymphoid-specific                                                              | HELLS    | 10q24.2       | 3.5   |
| 209636_at    | nuclear factor of kappa light polypeptide gene enhancer in B-cells 2 (p49/p100)          | NFKB2    | 10q24         | 3.479 |
| 201490_s_at  | peptidylprolyl isomerase F (cyclophilin F)                                               | PPIF     | 10q22-q23     | 3.479 |
| 221610_s_at  | signal-transducing adaptor protein-2                                                     | STAP2    | 19p13.3       | 3.455 |
| 225834_at    | Similar to RIKEN cDNA 2700049P18 gene                                                    | MGC57827 |               | 3.451 |
| 220658_s_at  | aryl hydrocarbon receptor nuclear translocator-like 2                                    | ARNTL2   | 12p12.2-p11.2 | 3.435 |
| 204224_s_at  | GTP cyclohydrolase 1 (dopa-responsive dystonia)                                          | GCH1     | 14q22.1-q22.2 | 3.43  |
| 233754_x_at  | zinc finger protein 71 (Cos26)                                                           | ZNF71    | 19q13.4       | 3.428 |
| 239413_at    | KIAA0912 protein                                                                         | Cep152   | 15q21.1       | 3.42  |
| 218182_s_at  | claudin 1                                                                                | CLDN1    | 3q28-q29      | 3.418 |
| 209544_at    | receptor-interacting serine-threonine kinase 2                                           | RIPK2    | 8q21          | 3.412 |

|             |                                                                                 |          |               |       |
|-------------|---------------------------------------------------------------------------------|----------|---------------|-------|
| 214228_x_at | tumor necrosis factor receptor superfamily, member 4                            | TNFRSF4  | 1p36          | 3.394 |
| 207535_s_at | nuclear factor of kappa light polypeptide gene enhancer in B-cells 2 (p49/p100) | NFKB2    | 10q24         | 3.356 |
| 204070_at   | retinoic acid receptor responder (tazarotene induced) 3                         | RARRES3  | 11q23         | 3.352 |
| 209493_at   | PDZ domain containing 3                                                         | PDZK3    | 5p13.3        | 3.319 |
| 209545_s_at | receptor-interacting serine-threonine kinase 2                                  | RIPK2    | 8q21          | 3.31  |
| 227647_at   | potassium voltage-gated channel, Isk-related family, member 3                   | KCNE3    | 11q13-q14     | 3.286 |
| 212142_at   | MCM4 minichromosome maintenance deficient 4 ( <i>S. cerevisiae</i> )            | MCM4     | 8q11.2        | 3.267 |
| 223103_at   | START domain containing 10                                                      | STARD10  | 11q13         | 3.25  |
| 226514_at   | zinc finger protein 71 ( <i>Cos26</i> )                                         | ZNF71    | 19q13.4       | 3.24  |
| 227928_at   | hypothetical protein FLJ20641                                                   | FLJ20641 | 12q23.3       | 3.201 |
| 242394_at   | CNKSR family member 3                                                           | CNKSR3   | 6q25.2        | 3.163 |
| 217933_s_at | leucine aminopeptidase 3                                                        | LAP3     | 4p15.32       | 3.14  |
| 203414_at   | monocyte to macrophage differentiation-associated                               | MMD      | 17q           | 3.14  |
| 226117_at   | TRAF-interacting protein with a forkhead-associated domain                      | TIFA     | 4q25          | 3.106 |
| 204908_s_at | B-cell CLL/lymphoma 3                                                           | BCL3     | 19q13.1-q13.2 | 3.101 |
| 213142_x_at | hypothetical protein LOC54103                                                   | LOC54103 | 7q11.23       | 3.101 |
| 219582_at   | opioid growth factor receptor-like 1                                            | OGFRL1   | 6q13          | 3.096 |
| 205339_at   | TAL1 ( <i>SCL</i> ) interrupting locus                                          | SIL      | 1q32 1p32     | 3.089 |
| 210176_at   | toll-like receptor 1                                                            | TLR1     | 4p14          | 3.078 |
| 219494_at   | RAD54 homolog B ( <i>S. cerevisiae</i> )                                        | RAD54B   | 8q21.3-q22    | 3.061 |
| 219258_at   | timeless-interacting protein                                                    | FLJ20516 | 15q22.31      | 3.052 |
| 210416_s_at | CHK2 checkpoint homolog ( <i>S. pombe</i> )                                     | CHEK2    | 22q11 22q12.1 | 3.044 |
| 228069_at   | family with sequence similarity 54, member A                                    | FAM54A   | 6q23.3        | 3.032 |
| 204519_s_at | plasma membrane proteolipid (plasmolipin)                                       | PLLP     | 16q13         | 3.018 |
| 219703_at   | meiosis-specific nuclear structural protein 1                                   | MNS1     | 15q21.3       | 2.992 |
| 204404_at   | solute carrier family 12 (sodium/potassium/chloride transporters), member 2     | SLC12A2  | 5q23.3        | 2.989 |
| 224204_x_at | aryl hydrocarbon receptor nuclear translocator-like 2                           | ARNTL2   | 12p12.2-p11.2 | 2.986 |
| 209607_x_at | sulfotransferase family, cytosolic, 1A, phenol-preferring, member 3             | SULT1A3  | 16p11.2       | 2.984 |
| 238542_at   | UL16 binding protein 2                                                          | ULBP2    | 6q25          | 2.977 |
| 228937_at   | hypothetical protein FLJ38725                                                   | FLJ38725 | 13q14.11      | 2.971 |
| 218627_at   | hypothetical protein FLJ11259                                                   | FLJ11259 | 12q23.3       | 2.969 |
| 202510_s_at | tumor necrosis factor, alpha-induced protein 2                                  | TNFAIP2  | 14q32         | 2.969 |
| 212141_at   | MCM4 minichromosome                                                             | MCM4     | 8q11.2        | 2.963 |

|             |                                                                                                                |          |                        |       |
|-------------|----------------------------------------------------------------------------------------------------------------|----------|------------------------|-------|
|             | maintenance deficient 4 ( <i>S. cerevisiae</i> )                                                               |          |                        |       |
| 228468_at   | microtubule associated serine/threonine kinase-like                                                            | MASTL    | 10p12.1                | 2.936 |
| 221978_at   | major histocompatibility complex, class I, F                                                                   | HLA-F    | 6p21.3                 | 2.919 |
| 231855_at   | KIAA1524                                                                                                       | KIAA1524 | 3q13.13                | 2.912 |
| 204767_s_at | flap structure-specific endonuclease 1                                                                         | FEN1     | 11q12                  | 2.906 |
| 1559064_at  | nucleoporin 153kDa                                                                                             | NUP153   | 6p22.3                 | 2.892 |
| 201762_s_at | proteasome (prosome, macropain) activator subunit 2 (PA28 beta)                                                | PSME2    | 14q11.2                | 2.886 |
| 214727_at   | breast cancer 2, early onset                                                                                   | BRCA2    | 13q12.3                | 2.885 |
| 219863_at   | hect domain and RLD 5                                                                                          | HERC5    | 4q22.1-q23             | 2.867 |
| 210868_s_at | ELOVL family member 6, elongation of long chain fatty acids (FEN1/Elo2, SUR4/Elo3-like, yeast)                 | ELOVL6   | 4q25                   | 2.856 |
| 205298_s_at | butyrophilin, subfamily 2, member A2                                                                           | BTN2A2   | 6p22.1                 | 2.847 |
| 201502_s_at | nuclear factor of kappa light polypeptide gene enhancer in B-cells inhibitor, alpha                            | NFKBIA   | 14q13                  | 2.845 |
| 208370_s_at | Down syndrome critical region gene 1                                                                           | DSCR1    | 21q22.1-q22.2 21q22.12 | 2.836 |
| 219761_at   | C-type lectin domain family 1, member A                                                                        | CLEC1A   | 12p13.2                | 2.835 |
| 226936_at   | chromosome 6 open reading frame 173                                                                            | C6orf173 | 6q22.32                | 2.83  |
| 215299_x_at | sulfotransferase family, cytosolic, 1A, phenol-preferring, member 1                                            | SULT1A1  | 16p12.1                | 2.822 |
| 205542_at   | six transmembrane epithelial antigen of the prostate 1                                                         | STEAP1   | 7q21                   | 2.815 |
| 225314_at   | OCIA domain containing 2                                                                                       | OCIAD2   | 4p12                   | 2.81  |
| 221685_s_at | hypothetical protein FLJ20364                                                                                  | FLJ20364 | 5q35.1                 | 2.807 |
| 227481_at   | CNKSR family member 3                                                                                          | CNKSR3   | 6q25.2                 | 2.806 |
| 224832_at   | dual specificity phosphatase 16                                                                                | DUSP16   | 12p13                  | 2.782 |
| 213134_x_at | BTG family, member 3                                                                                           | BTG3     | 21q21.1-q21.2          | 2.777 |
| 205548_s_at | BTG family, member 3                                                                                           | BTG3     | 21q21.1-q21.2          | 2.776 |
| 216237_s_at | MCM5 minichromosome                                                                                            | MCM5     | 22q13.1                | 2.772 |
| 202905_x_at | maintenance deficient 5, cell division cycle 46 ( <i>S. cerevisiae</i> ) Nijmegen breakage syndrome 1 (nibrin) | NBS1     | 8q21                   | 2.77  |
| 208534_s_at | RAS p21 protein activator 4                                                                                    | RASA4    | 7q22-q31.1             | 2.762 |
| 220060_s_at | hypothetical protein FLJ20641                                                                                  | FLJ20641 | 12q23.3                | 2.755 |
| 223586_at   | aryl hydrocarbon receptor nuclear translocator-like 2                                                          | ARNTL2   | 12p12.2-p11.2          | 2.752 |
| 216228_s_at | WD repeat and HMG-box DNA binding protein 1                                                                    | WDHD1    | 14q22.2                | 2.744 |
| 204531_s_at | breast cancer 1, early onset                                                                                   | BRCA1    | 17q21                  | 2.72  |
| 1553142_at  | hypothetical protein FLJ38725                                                                                  | FLJ38725 | 13q14.11               | 2.707 |
| 206102_at   | KIAA0186 gene product                                                                                          | KIAA0186 | 20p11.21               | 2.704 |



|              |                                                                          |           |              |       |
|--------------|--------------------------------------------------------------------------|-----------|--------------|-------|
| 205566_at    | abhydrolase domain containing 2                                          | ABHD2     | 15q26.1      | 2.699 |
| 203615_x_at  | sulfotransferase family, cytosolic, 1A, phenol-preferring, member 1      | SULT1A1   | 16p12.1      | 2.691 |
| 218983_at    | complement component 1, r subcomponent-like                              | C1RL      | 12p13.31     | 2.687 |
| 204023_at    | replication factor C (activator 1) 4, 37kDa                              | RFC4      | 3q27         | 2.677 |
| 210580_x_at  | sulfotransferase family, cytosolic, 1A, phenol-preferring, member 3      | SULT1A3   | 16p11.2      | 2.667 |
| 1555819_s_at | hypothetical protein LOC201191                                           | LOC201191 | 17q21.33     | 2.659 |
| 226003_at    | kinesin family member 21A                                                | KIF21A    | 12q12        | 2.649 |
| 218404_at    | sorting nexin 10                                                         | SNX10     | 7p15.2       | 2.645 |
| 240456_at    | Hypothetical protein FLJ11795                                            | FLJ11795  | 5q11.2       | 2.643 |
| 219056_at    | hypothetical protein FLJ11712                                            | FLJ11712  | 13q14.3      | 2.636 |
| 211588_s_at  | promyelocytic leukemia                                                   | PML       | 15q22        | 2.626 |
| 202533_s_at  | dihydrofolate reductase                                                  | DHFR      | 5q11.2-q13.2 | 2.619 |
| 238469_at    | Chromosome 6 open reading frame 155                                      | C6orf155  | 6q13         | 2.606 |
| 214804_at    | FSH primary response (LRPR1 homolog, rat) 1                              | FSHPRH1   | Xq22.1       | 2.604 |
| 222748_s_at  | thioredoxin-like 4B                                                      | TXNL4B    | 16q22.2      | 2.601 |
| 209785_s_at  | phospholipase A2, group IVC (cytosolic, calcium-independent)             | PLA2G4C   | 19q13.3      | 2.592 |
| 219364_at    | likely ortholog of mouse D11lgp2                                         | LGP2      | 17q21.2      | 2.585 |
| 229306_at    | Nuclear localized factor 2                                               | NLF2      | 15q22.2      | 2.581 |
| 213293_s_at  | tripartite motif-containing 22                                           | TRIM22    | 11p15        | 2.567 |
| 1554080_at   | RCD1 required for cell differentiation1 homolog (S. pombe)               | RQCD1     | 2q35         | 2.525 |
| 225570_at    | solute carrier family 41, member 1                                       | SLC41A1   | 1q32.1       | 2.521 |
| 1554271_a_at | hypothetical gene supported by BC007071                                  | dJ383J4.3 | 1q25.1       | 2.511 |
| 207843_x_at  | cytochrome b-5                                                           | CYB5      | 18q23        | 2.506 |
| 210985_s_at  | nuclear antigen Sp100                                                    | SP100     | 2q37.1       | 2.503 |
| 211075_s_at  | CD47 antigen (Rh-related antigen, integrin-associated signal transducer) | CD47      | 3q13.1-q13.2 | 2.501 |
| 202555_s_at  | myosin, light polypeptide kinase                                         | MYLK      | 3q21         | 2.49  |
| 222037_at    | MCM4 minichromosome maintenance deficient 4 (S. cerevisiae)              | MCM4      | 8q11.2       | 2.482 |
| 204601_at    | Nedd4 binding protein 1                                                  | N4BP1     | 16q12.1      | 2.477 |
| 208829_at    | TAP binding protein (tapasin)                                            | TAPBP     | 6p21.3       | 2.476 |
| 223515_s_at  | coenzyme Q3 homolog, methyltransferase (yeast)                           | COQ3      | 6q16.3       | 2.466 |
| 1555826_at   | Baculoviral IAP repeat-containing 5 (survivin)                           | BIRC5     | 17q25        | 2.465 |
| 224823_at    | myosin, light polypeptide kinase                                         | MYLK      | 3q21         | 2.449 |
| 222646_s_at  | ERO1-like (S. cerevisiae)                                                | ERO1L     | 14q22.1      | 2.446 |
| 235088_at    | hypothetical protein LOC201725                                           | LOC201725 | 4q32.1       | 2.439 |
| 219182_at    | carbohydrate (N-acetylglucosamine 6-O) sulfotransferase 5                | CHST5     | 16q22.3      | 2.434 |

|              |                                                                                          |           |              |       |
|--------------|------------------------------------------------------------------------------------------|-----------|--------------|-------|
| 1555870_at   | hypothetical protein FLJ32096                                                            | FLJ32096  | 1p36.31      | 2.422 |
| 202907_s_at  | Nijmegen breakage syndrome 1 (nibrin)                                                    | NBS1      | 8q21         | 2.418 |
| 227350_at    | CDNA FLJ11381 fis, clone HEMBA1000501                                                    |           |              | 2.418 |
| 218824_at    | hypothetical protein FLJ10781                                                            | FLJ10781  | 19q13.32     | 2.414 |
| 201202_at    | proliferating cell nuclear antigen                                                       | PCNA      | 20pter-p12   | 2.413 |
| 223417_at    | RAD18 homolog ( <i>S. cerevisiae</i> )                                                   | RAD18     | 3p25-p24     | 2.411 |
| 202672_s_at  | activating transcription factor 3                                                        | ATF3      | 1q32.3       | 2.408 |
| 239302_s_at  |                                                                                          |           |              | 2.406 |
| 1563088_a_at | hypothetical protein LOC284837                                                           | LOC284837 | 21q22.3      | 2.405 |
| 213186_at    | zinc finger DAZ interacting protein 3                                                    | DZIP3     | 3q13.13      | 2.404 |
| 208315_x_at  | TNF receptor-associated factor 3                                                         | TRAF3     | 14q32.32     | 2.402 |
| 204766_s_at  | nudix (nucleoside diphosphate linked moiety X)-type motif 1                              | NUDT1     | 7p22         | 2.401 |
| 206197_at    | non-metastatic cells 5, protein expressed in (nucleoside-diphosphate kinase)             | NME5      | 5q31         | 2.397 |
| 1552921_a_at | fidgetin-like 1                                                                          | FIGNL1    | 7p12.2       | 2.396 |
| 76897_s_at   | KIAA0674                                                                                 | KIAA0674  | 9q32         | 2.396 |
| 224701_at    | poly (ADP-ribose) polymerase family, member 14                                           | PARP14    | 3q21.1       | 2.395 |
| 206673_at    | putative G protein coupled receptor                                                      | GPR       | 15q14-q15.1  | 2.393 |
| 202748_at    | guanylate binding protein 2, interferon-inducible                                        | GBP2      | 1p22.2       | 2.392 |
| 235126_at    | LQK1 hypothetical protein short isoform (LQK1) mRNA, complete cds, alternatively spliced |           |              | 2.391 |
| 210115_at    | ribosomal protein L39-like                                                               | RPL39L    | 3q27         | 2.379 |
| 203046_s_at  | timeless homolog ( <i>Drosophila</i> )                                                   | TIMELESS  | 12q12-q13    | 2.376 |
| 229671_s_at  | Chromosome 21 open reading frame 45                                                      | C21orf45  | 21q22.11     | 2.37  |
| 227259_at    | CD47 antigen (Rh-related antigen, integrin-associated signal transducer)                 | CD47      | 3q13.1-q13.2 | 2.357 |
| 1552584_at   | interleukin 12 receptor, beta 1                                                          | IL12RB1   | 19p13.1      | 2.355 |
| 238419_at    | pleckstrin homology-like domain, family B, member 2                                      | PHLDB2    | 3q13.2       | 2.35  |
| 227021_at    | amine oxidase (flavin containing) domain 1                                               | AOF1      | 6p22.3       | 2.339 |
| 238844_s_at  | nephronophthisis 1 (juvenile)                                                            | NPHP1     | 2q13         | 2.33  |
| 205932_s_at  | msh homeo box homolog 1 ( <i>Drosophila</i> )                                            | MSX1      | 4p16.3-p16.1 | 2.325 |
| 209366_x_at  | cytochrome b-5                                                                           | CYB5      | 18q23        | 2.32  |
| 232322_x_at  | START domain containing 10                                                               | STARD10   | 11q13        | 2.314 |
| 39817_s_at   | chromosome 6 open reading frame 108                                                      | C6orf108  | 6p21.1       | 2.313 |
| 242157_at    |                                                                                          |           |              | 2.31  |
| 204695_at    | cell division cycle 25A                                                                  | CDC25A    | 3p21         | 2.302 |
| 212621_at    | KIAA0286 protein                                                                         | KIAA0286  | 12q13.3      | 2.301 |
| 204441_s_at  | polymerase (DNA directed), alpha 2 (70kD subunit)                                        | POLA2     | 11q13.1      | 2.3   |

|             |                                                                                                |           |              |       |
|-------------|------------------------------------------------------------------------------------------------|-----------|--------------|-------|
| 227846_at   | putative G protein coupled receptor                                                            | GPR       | 15q14-q15.1  | 2.295 |
| 235707_at   | hypothetical protein LOC221710                                                                 | LOC221710 | 6p24.1       | 2.289 |
| 213372_at   | progesterin and adipoQ receptor family member III                                              | PAQR3     | 4q21.21      | 2.288 |
| 215726_s_at | cytochrome b-5                                                                                 | CYB5      | 18q23        | 2.286 |
| 209239_at   | nuclear factor of kappa light polypeptide gene enhancer in B-cells 1 (p105)                    | NFKB1     | 4q24         | 2.281 |
| 204728_s_at | WD repeat and HMG-box DNA binding protein 1                                                    | WDHD1     | 14q22.2      | 2.278 |
| 221765_at   |                                                                                                |           |              | 2.275 |
| 229972_at   |                                                                                                |           |              | 2.27  |
| 223520_s_at | kinesin family member 13A                                                                      | KIF13A    | 6p23         | 2.263 |
| 213857_s_at | CD47 antigen (Rh-related antigen, integrin-associated signal transducer)                       | CD47      | 3q13.1-q13.2 | 2.246 |
| 217478_s_at | major histocompatibility complex, class II, DM alpha                                           | HLA-DMA   | 6p21.3       | 2.246 |
| 241360_at   | similar to hypothetical protein                                                                | LOC387816 | 11q24.2      | 2.246 |
| 228946_at   | PDZ domain containing 6                                                                        | PDZK6     | 4q28.1       | 2.23  |
| 238729_x_at | Salvador homolog 1 (Drosophila)                                                                | SAV1      | 14q13-q23    | 2.217 |
| 215629_s_at | deleted in lymphocytic leukemia, 2                                                             | DLEU2     | 13q14.3      | 2.209 |
| 226329_s_at | hypothetical protein BC018453                                                                  | LOC129531 | 2q11.2       | 2.209 |
| 224967_at   | UDP-glucose ceramide glucosyltransferase                                                       | UGCG      | 9q31         | 2.209 |
| 204256_at   | ELOVL family member 6, elongation of long chain fatty acids (FEN1/Elo2, SUR4/Elo3-like, yeast) | ELOVL6    | 4q25         | 2.201 |
| 228050_at   | Src-associated protein SAW                                                                     | FLJ12787  | 5q13.2       | 2.198 |
| 219544_at   | FLJ22624 protein                                                                               | FLJ22624  | 13q22.1      | 2.189 |
| 201489_at   | peptidylprolyl isomerase F (cyclophilin F)                                                     | PPIF      | 10q22-q23    | 2.183 |
| 218543_s_at | zinc finger CCCH type domain containing 1                                                      | ZC3HD C1  | 7q34         | 2.176 |
| 223172_s_at | mitochondrial protein 18 kDa                                                                   | MTP18     | 22q          | 2.171 |
| 232746_at   | Chemokine orphan receptor 1                                                                    | CMKOR1    | 2q37.3       | 2.169 |
| 205071_x_at | X-ray repair complementing defective repair in Chinese hamster cells 4                         | XRCC4     | 5q13-q14     | 2.168 |
| 201663_s_at | SMC4 structural maintenance of chromosomes 4-like 1 (yeast)                                    | SMC4L1    | 3q26.1       | 2.166 |
| 201930_at   | MCM6 minichromosome maintenance deficient 6 (MIS5 homolog, S. pombe) (S. cerevisiae)           | MCM6      | 2q21         | 2.16  |
| 218284_at   | SMAD, mothers against DPP homolog 3 (Drosophila)                                               | SMAD3     | 15q22.33     | 2.157 |
| 209507_at   | replication protein A3, 14kDa                                                                  | RPA3      | 7p22         | 2.153 |
| 1558783_at  | Wilms tumor 1 associated protein                                                               | WTAP      | 6q25-q27     | 2.146 |
| 215215_s_at | exonuclease NEF-sp                                                                             | LOC81691  | 16p12.3      | 2.145 |

|              |                                                                                                                            |           |          |       |
|--------------|----------------------------------------------------------------------------------------------------------------------------|-----------|----------|-------|
| 1553810_a_at | KIAA1524                                                                                                                   | KIAA1524  | 3q13.13  | 2.142 |
| 207122_x_at  | sulfotransferase family, cytosolic, 1A, phenol-preferring, member 2                                                        | SULT1A2   | 16p12.1  | 2.14  |
| 206178_at    | phospholipase A2, group V                                                                                                  | PLA2G5    | 1p36-p34 | 2.133 |
| 209640_at    | promyelocytic leukemia                                                                                                     | PML       | 15q22    | 2.133 |
| 214426_x_at  | chromatin assembly factor 1, subunit A (p150)                                                                              | CHAF1A    | 19p13.3  | 2.128 |
| 203270_at    | deoxythymidylate kinase (thymidylate kinase)                                                                               | DTYMK     | 2q37.3   | 2.115 |
| 236506_at    | Ninein (GSK3B interacting protein)                                                                                         | NIN       | 14q22.1  | 2.113 |
| 235387_at    | Hypothetical protein FLJ13273                                                                                              | FLJ13273  | 4q24     | 2.111 |
| 207590_s_at  | FSH primary response (LRPR1 homolog, rat) 1                                                                                | FSHPRH1   | Xq22.1   | 2.111 |
| 231963_at    | Homo sapiens, clone IMAGE:3869276, mRNA                                                                                    |           |          | 2.107 |
| 207565_s_at  | major histocompatibility complex, class I-related                                                                          | MR1       | 1q25.3   | 2.106 |
| 211385_x_at  | sulfotransferase family, cytosolic, 1A, phenol-preferring, member 2                                                        | SULT1A2   | 16p12.1  | 2.106 |
| 1552370_at   | hypothetical protein LOC132321                                                                                             | LOC132321 | 4q28.2   | 2.102 |
| 205296_at    | retinoblastoma-like 1 (p107)                                                                                               | RBL1      | 20q11.2  | 2.102 |
| 241379_at    | chromosome 2 open reading frame 13                                                                                         | C2orf13   | 2p13.3   | 2.101 |
| 208103_s_at  | acidic (leucine-rich) nuclear phosphoprotein 32 family, member E                                                           | ANP32E    | 1q21.2   | 2.1   |
| 218776_s_at  | hypothetical protein FLJ23375                                                                                              | FLJ23375  | 15q15.2  | 2.1   |
| 211115_x_at  | survival of motor neuron protein interacting protein 1                                                                     | SIP1      | 14q13    | 2.099 |
| 236982_at    | Integrin, beta 2 (antigen CD18 (p95), lymphocyte function-associated antigen 1; macrophage antigen 1 (mac-1) beta subunit) | ITGB2     | 21q22.3  | 2.093 |
| 224200_s_at  | RAD18 homolog ( <i>S. cerevisiae</i> )                                                                                     | RAD18     | 3p25-p24 | 2.086 |
| 228144_at    | zinc finger protein 300                                                                                                    | ZNF300    | 5q33.1   | 2.086 |
| 222803_at    | phosphoribosyl transferase domain containing 1                                                                             | PRTFDC1   | 10p12.1  | 2.084 |
| 219202_at    | rhomboid, veinlet-like 6 ( <i>Drosophila</i> )                                                                             | RHBDL6    | 17q25.1  | 2.079 |
| 209980_s_at  | serine hydroxymethyltransferase 1 (soluble)                                                                                | SHMT1     | 17p11.2  | 2.077 |
| 212285_s_at  | agrin                                                                                                                      | AGRN      | 1p36.33  | 2.068 |
| 216952_s_at  | lamin B2                                                                                                                   | LMNB2     | 19p13.3  | 2.065 |
| 224320_s_at  | MCM8 minichromosome maintenance deficient 8 ( <i>S. cerevisiae</i> )                                                       | MCM8      | 20p12.3  | 2.061 |
| 221571_at    | TNF receptor-associated factor 3                                                                                           | TRAF3     | 14q32.32 | 2.059 |
| 1554438_at   | KIAA1217                                                                                                                   | KIAA1217  | 10p12.31 | 2.057 |
| 204238_s_at  | chromosome 6 open reading frame 108                                                                                        | C6orf108  | 6p21.1   | 2.056 |
| 215493_x_at  | butyrophilin, subfamily 2, member A1                                                                                       | BTN2A1    | 6p22.1   | 2.051 |
| 233999_s_at  | hypothetical protein FLJ12571                                                                                              | FLJ12571  | 7q34     | 2.048 |

|             |                                                                              |          |                   |       |
|-------------|------------------------------------------------------------------------------|----------|-------------------|-------|
| 1554730_at  | multiple C2-domains with two transmembrane regions 1                         | MCTP1    | 5q15              | 2.048 |
| 218557_at   | nitrilase family, member 2                                                   | NIT2     | 3q12.2            | 2.048 |
| 211114_x_at | survival of motor neuron protein interacting protein 1                       | SIP1     | 14q13             | 2.048 |
| 206613_s_at | TATA box binding protein (TBP)-associated factor, RNA polymerase I, A, 48kDa | TAF1A    | 1q42              | 2.048 |
| 215773_x_at | poly (ADP-ribose) polymerase family, member 2                                | PARP2    | 14q11.2-q12       | 2.047 |
| 217419_x_at | agrin                                                                        | AGRN     | 1p36.33           | 2.04  |
| 202613_at   | CTP synthase                                                                 | CTPS     | 1p34.1            | 2.04  |
| 236487_at   | Hypothetical protein FLJ30655                                                | FLJ30655 | 4q28.2            | 2.039 |
| 211732_x_at | histamine N-methyltransferase                                                | HNMT     | 2q22.1            | 2.038 |
| 223738_s_at | phosphoglucosyltransferase 2                                                 | PGM2     | 4p14              | 2.037 |
| 221903_s_at | cylindromatosis (turban tumor syndrome)                                      | CYLD     | 16q12-q13 16q12.1 | 2.034 |
| 218992_at   | chromosome 9 open reading frame 46                                           | C9orf46  | 9p24.1            | 2.032 |
| 211256_x_at | butyrophilin, subfamily 2, member A1                                         | BTN2A1   | 6p22.1            | 2.021 |
| 218073_s_at | hypothetical protein FLJ10407                                                | FLJ10407 | 1p32.3            | 2.016 |
| 219294_at   | chromosome 6 open reading frame 139                                          | C6orf139 | 6p12.3            | 2.015 |
| 203976_s_at | chromatin assembly factor 1, subunit A (p150)                                | CHAF1A   | 19p13.3           | 2.014 |
| 32069_at    | Nedd4 binding protein 1                                                      | N4BP1    | 16q12.1           | 2.014 |
| 225017_at   | coiled-coil domain containing 14                                             | CCDC14   | 3q21.1            | 2.012 |
| 226118_at   | hypothetical protein MGC11266                                                | MGC11266 | 2p23.3            | 2.008 |
| 213454_at   | apoptosis-inducing, TAF9-like domain 1                                       | APITD1   |                   | 2.006 |
| 1555279_at  | armadillo repeat containing 8                                                | ARMC8    | 3q22.3            | 2.004 |
| 208107_s_at | exonuclease NEF-sp                                                           | LOC81691 | 16p12.3           | 2.004 |
| 218170_at   | isochorismatase domain containing 1                                          | ISOC1    | 5q22.1-q33.3      | 2.003 |
| 205063_at   | survival of motor neuron protein interacting protein 1                       | SIP1     | 14q13             | 2.003 |
| 230741_at   | Full length insert cDNA clone YX74D05                                        |          |                   | 2.002 |
| 203882_at   | interferon-stimulated transcription factor 3, gamma 48kDa                    | ISGF3G   | 14q11.2           | 2.001 |
| 244133_at   | Ubiquitin specific protease 49                                               | MGC20741 | 6p21              | 2.000 |

| Probe set ID | Gene title                                       | Gene symbol | Chromosomal location | Fold down-regulation |
|--------------|--------------------------------------------------|-------------|----------------------|----------------------|
| 237741_at    | Hypothetical protein FLJ10618                    | FLJ10618    | 3q23                 | 2.000                |
| 203059_s_at  | 3'-phosphoadenosine 5'-phosphosulfate synthase 2 | PAPSS2      | 10q23-q24            | 2.004                |
| 204657_s_at  | SHB (Src homology 2 domain                       | SHB         | 9p12-p11             | 2.004                |

|              |                                                                                                                              |                   |                   |       |
|--------------|------------------------------------------------------------------------------------------------------------------------------|-------------------|-------------------|-------|
|              | containing) adaptor protein B                                                                                                |                   |                   |       |
| 209502_s_at  | BAI1-associated protein 2                                                                                                    | BAIAP2            | 17q25             | 2.008 |
| 203514_at    | mitogen-activated protein kinase<br>kinase kinase 3                                                                          | MAP3K3            | 17q23.3           | 2.020 |
| 229011_at    | Transcribed locus, weakly similar to XP_495846.1 weakly<br>similar to zinc finger protein 195 [Homo sapiens]                 |                   |                   | 2.020 |
| 230821_at    | Zinc finger protein 148 (pHZ-52)                                                                                             | ZNF148            | 3q21              | 2.024 |
| 212462_at    |                                                                                                                              |                   |                   | 2.024 |
| 236106_at    | Hypothetical protein LOC339210                                                                                               | LOC339210         | 17q23.2           | 2.028 |
| 235684_s_at  | sestrin 3                                                                                                                    | SESN3             | 11q21             | 2.028 |
| 235526_at    | SRY (sex determining region Y)-box<br>6                                                                                      | SOX6              | 11p15.3           | 2.028 |
| 212573_at    | KIAA0830 protein                                                                                                             | KIAA0830          | 11q21             | 2.033 |
| 208663_s_at  | tetratricopeptide repeat domain 3                                                                                            | TTC3              | 21q22.2           | 2.033 |
| 203633_at    |                                                                                                                              |                   |                   | 2.033 |
| 225435_at    | Signal sequence receptor, alpha<br>(translocon-associated protein alpha)                                                     | SSR1              | 6p24.3            | 2.045 |
| 209877_at    | synuclein, gamma (breast cancer-<br>specific protein 1)                                                                      | SNCG              | 10q23.2-<br>q23.3 | 2.053 |
| 1569380_a_at | Homocysteine-inducible,<br>endoplasmic reticulum stress-<br>inducible, ubiquitin-like domain<br>member 1                     | HERPUD1           | 16q12.2-<br>q13   | 2.058 |
| 209234_at    | kinesin family member 1B                                                                                                     | KIF1B             | 1p36.2            | 2.058 |
| 235167_at    | KIAA0220-like protein                                                                                                        | LOC23117          | 16p12.2           | 2.058 |
| 227264_at    | TNF receptor-associated factor 6                                                                                             | TRAF6             | 11p12             | 2.058 |
| 223283_s_at  | serologically defined colon cancer<br>antigen 33                                                                             | SDCCAG33          | 18q22.3           | 2.062 |
| 223094_s_at  | ankylosis, progressive homolog<br>(mouse)                                                                                    | ANKH              | 5p15.1            | 2.066 |
| 208661_s_at  | tetratricopeptide repeat domain 3                                                                                            | TTC3              | 21q22.2           | 2.066 |
| 223282_at    | serologically defined colon cancer<br>antigen 33                                                                             | SDCCAG33          | 18q22.3           | 2.070 |
| 230653_at    | Transcribed locus                                                                                                            |                   |                   | 2.070 |
| 214717_at    | hypothetical protein<br>DKFZp434H1419                                                                                        | DKFZp434<br>H1419 | 2q35              | 2.075 |
| 219058_x_at  | lipocalin 7                                                                                                                  | LCN7              | 1p35.2            | 2.075 |
| 205594_at    | zinc finger protein 652                                                                                                      | ZNF652            | 17q21.32          | 2.075 |
| 227417_at    | hypothetical protein FLJ20605                                                                                                | FLJ20605          | 1q41              | 2.079 |
| 224835_at    | hypothetical protein KIAA1434                                                                                                | KIAA1434          | 20p12.3           | 2.079 |
| 205503_at    | protein tyrosine phosphatase, non-<br>receptor type 14                                                                       | PTPN14            | 1q32.2            | 2.079 |
| 1558605_at   | Homo sapiens, clone IMAGE:4819775, mRNA                                                                                      |                   |                   | 2.079 |
| 227529_s_at  | A kinase (PRKA) anchor protein<br>(gravin) 12                                                                                | AKAP12            | 6q24-q25          | 2.088 |
| 223093_at    | ankylosis, progressive homolog<br>(mouse)                                                                                    | ANKH              | 5p15.1            | 2.088 |
| 1555950_a_at | decay accelerating factor for<br>complement (CD55, Cromer blood<br>group system)                                             | DAF               | 1q32              | 2.088 |
| 213895_at    | epithelial membrane protein 1                                                                                                | EMP1              | 12p12.3           | 2.088 |
| 218418_s_at  | ankyrin repeat domain 25                                                                                                     | ANKRD25           | 19p13.2           | 2.092 |
| 238884_at    | Catenin (cadherin-associated<br>protein), delta 1                                                                            | CTNND1            | 11q11             | 2.092 |
| 208050_s_at  | caspase 2, apoptosis-related cysteine<br>protease (neural precursor cell<br>expressed, developmentally down-<br>regulated 2) | CASP2             | 7q34-q35          | 2.101 |
| 1559725_at   | Hypothetical gene supported by AL832797                                                                                      |                   | 11q13.4           | 2.101 |

|              |                                                                                                          |           |               |       |
|--------------|----------------------------------------------------------------------------------------------------------|-----------|---------------|-------|
| 212638_s_at  | WW domain containing E3 ubiquitin protein ligase 1                                                       | WWP1      | 8q21          | 2.105 |
| 1555926_a_at | CDNA FLJ30680 fis, clone FCBBF2000123                                                                    |           |               | 2.110 |
| 238694_at    | CDNA FLJ33029 fis, clone THYMU2000162                                                                    |           |               | 2.110 |
| 212098_at    | hypothetical protein LOC151162                                                                           | LOC151162 | 2q21.3        | 2.114 |
| 223712_at    | 6-pyruvoyl-tetrahydropterin synthase/dimerization cofactor of hepatocyte nuclear factor 1 alpha (TCF1) 2 | PCBD2     | 5q31.1        | 2.114 |
| 233202_at    | contactin associated protein-like 3                                                                      | CNTNAP3   | 9p13.1        | 2.119 |
| 1564796_at   | epithelial membrane protein 1                                                                            | EMP1      | 12p12.3       | 2.128 |
| 240172_at    | PTX1 protein                                                                                             | PTX1      | 12p11.22      | 2.137 |
| 202132_at    | WW domain containing transcription regulator 1                                                           | WWTR1     | 3q23-q24      | 2.137 |
| 206028_s_at  | c-mer proto-oncogene tyrosine kinase                                                                     | MERTK     | 2q14.1        | 2.151 |
| 203853_s_at  | GRB2-associated binding protein 2                                                                        | GAB2      | 11q14.1       | 2.179 |
| 238467_at    | Transcribed locus                                                                                        |           |               | 2.179 |
| 209991_x_at  | G protein-coupled receptor 51                                                                            | GPR51     | 9q22.1-q22.3  | 2.183 |
| 212608_s_at  | AF034176 Human mRNA (Tripodis and Ragoussis) Homo sapiens cDNA clone ntcon5 contig, mRNA sequence        |           |               | 2.183 |
| 239035_at    | 5,10-methylenetetrahydrofolate reductase (NADPH)                                                         | MTHFR     | 1p36.3        | 2.188 |
| 212452_x_at  | MYST histone acetyltransferase (monocytic leukemia) 4                                                    | MYST4     | 10q22.2       | 2.188 |
| 206127_at    | ELK3, ETS-domain protein (SRF accessory protein 2)                                                       | ELK3      | 12q23         | 2.193 |
| 226103_at    | nexilin (F actin binding protein)                                                                        | NEXN      | 1p31.1        | 2.193 |
| 208003_s_at  | nuclear factor of activated T-cells 5, tonicity-responsive                                               | NFAT5     | 16q22.1       | 2.193 |
| 204288_s_at  | Arg/Abl-interacting protein ArgBP2                                                                       | ARGBP2    | 4q35.1        | 2.208 |
| 1554010_at   | N-deacetylase/N-sulfotransferase (heparan glucosaminy) 1                                                 | NDST1     | 5q33.1        | 2.208 |
| 238824_at    | CDNA FLJ30581 fis, clone BRAWH2007069                                                                    |           |               | 2.217 |
| 1557505_a_at | Signal recognition particle 54kDa                                                                        | SRP54     | 14q13.2       | 2.227 |
| 206170_at    | adrenergic, beta-2-, receptor, surface                                                                   | ADRB2     | 5q31-q32      | 2.237 |
| 204072_s_at  | hypothetical protein CG003                                                                               | 13CDNA73  | 13q13.1       | 2.247 |
| 200879_s_at  | endothelial PAS domain protein 1                                                                         | EPAS1     | 2p21-p16      | 2.247 |
| 227501_at    | WD repeat and SOCS box-containing 1                                                                      | WSB1      | 17q11.1       | 2.252 |
| 230330_at    | Protein phosphatase 1D magnesium-dependent, delta isoform                                                | PPM1D     | 17q23.2       | 2.257 |
| 213022_s_at  |                                                                                                          |           |               | 2.257 |
| 237062_at    | Ring finger protein 10                                                                                   | RNF10     | 12q24.31      | 2.268 |
| 235693_at    | Transcribed locus                                                                                        |           |               | 2.268 |
| 210026_s_at  | caspase recruitment domain family, member 10                                                             | CARD10    | 22q13.1       | 2.283 |
| 239942_at    | Transcribed locus                                                                                        |           |               | 2.283 |
| 213605_s_at  | Hypothetical protein MGC22265                                                                            | MGC22265  | 5p14.3        | 2.288 |
| 204566_at    | protein phosphatase 1D magnesium-dependent, delta isoform                                                | PPM1D     | 17q23.2       | 2.294 |
| 212831_at    | EGF-like-domain, multiple 5                                                                              | EGFL5     | 9q32-q33.3    | 2.299 |
| 203157_s_at  | glutaminase                                                                                              | GLS       | 2q32-q34      | 2.309 |
| 228456_s_at  | hypothetical protein LOC149832                                                                           | LOC149832 | 20p13         | 2.309 |
| 210687_at    | carnitine palmitoyltransferase 1A (liver)                                                                | CPT1A     | 11q13.1-q13.2 | 2.315 |

|              |                                                                                                   |          |               |       |
|--------------|---------------------------------------------------------------------------------------------------|----------|---------------|-------|
| 1552309_a_at | nexilin (F actin binding protein)                                                                 | NEXN     | 1p31.1        | 2.315 |
| 1552316_a_at | GTPase, IMAP family member 1                                                                      | GIMAP1   | 7q36.1        | 2.320 |
| 214496_x_at  | MYST histone acetyltransferase (monocytic leukemia) 4                                             | MYST4    | 10q22.2       | 2.320 |
| 225197_at    | PRO0149 protein                                                                                   | PRO0149  | 16p13.2       | 2.331 |
| 244774_at    | Phosphatase and actin regulator 2                                                                 | PHACTR2  | 6q24.2        | 2.336 |
| 229803_s_at  | AF034176 Human mRNA (Tripodis and Ragoussis) Homo sapiens cDNA clone ntcon5 contig, mRNA sequence |          |               | 2.336 |
| 218711_s_at  | serum deprivation response (phosphatidylserine binding protein)                                   | SDPR     | 2q32-q33      | 2.342 |
| 1555858_at   | CDNA FLJ36321 fis, clone THYMU2005482                                                             |          |               | 2.347 |
| 203159_at    | glutaminase                                                                                       | GLS      | 2q32-q34      | 2.353 |
| 215248_at    | growth factor receptor-bound protein 10                                                           | GRB10    | 7p12-p11.2    | 2.358 |
| 219957_at    |                                                                                                   |          |               | 2.364 |
| 203634_s_at  | carnitine palmitoyltransferase 1A (liver)                                                         | CPT1A    | 11q13.1-q13.2 | 2.370 |
| 235060_at    | KIAA0220-like protein                                                                             | LOC23117 | 16p12.2       | 2.370 |
| 221747_at    | Tensin                                                                                            | TNS      | 2q35-q36      | 2.370 |
| 205088_at    | chromosome X open reading frame 6                                                                 | CXorf6   | Xq28          | 2.387 |
| 226365_at    | CDNA FLJ40901 fis, clone UTERU2003704                                                             |          |               | 2.404 |
| 227195_at    | zinc finger protein 503                                                                           | ZNF503   | 10q22.2       | 2.427 |
| 225532_at    | Cdk5 and Abl enzyme substrate 1                                                                   | CABLES1  | 18q11.2       | 2.445 |
| 236401_at    |                                                                                                   |          |               | 2.445 |
| 209427_at    | smoothelin                                                                                        | SMTN     | 22q12.2       | 2.457 |
| 229958_at    | Ceroid-lipofuscinosis, neuronal 8 (epilepsy, progressive with mental retardation)                 | CLN8     | 8p23          | 2.481 |
| 237459_at    | PCTAIRE protein kinase 2                                                                          | PCK2     | 12q23.1       | 2.488 |
| 226069_at    | prickle-like 1 (Drosophila)                                                                       | PRICKLE1 | 12q12         | 2.488 |
| 224559_at    | metastasis associated lung adenocarcinoma transcript 1 (non-coding RNA)                           | MALAT1   | 11q13.1       | 2.494 |
| 209006_s_at  | NPD014 protein                                                                                    | NPD014   | 1p36.13-p35.1 | 2.494 |
| 1552318_at   |                                                                                                   |          |               | 2.494 |
| 203555_at    | protein tyrosine phosphatase, non-receptor type 18 (brain-derived)                                | PTPN18   | 2q21.1        | 2.500 |
| 230053_at    | Transcribed locus                                                                                 |          |               | 2.519 |
| 241824_at    | FOS-like antigen 2                                                                                | FOSL2    | 2p23.3        | 2.532 |
| 207390_s_at  | smoothelin                                                                                        | SMTN     | 22q12.2       | 2.532 |
| 226712_at    | Signal sequence receptor, alpha (translocon-associated protein alpha)                             | SSR1     | 6p24.3        | 2.558 |
| 210688_s_at  | carnitine palmitoyltransferase 1A (liver)                                                         | CPT1A    | 11q13.1-q13.2 | 2.591 |
| 213649_at    | splicing factor, arginine/serine-rich 7, 35kDa                                                    | SFRS7    | 2p22.1        | 2.611 |
| 209468_at    | low density lipoprotein receptor-related protein 5                                                | LRP5     | 11q13.4       | 2.632 |
| 223315_at    | netrin 4                                                                                          | NTN4     | 12q22-q23     | 2.632 |
| 221748_s_at  | tensin                                                                                            | TNS      | 2q35-q36      | 2.632 |
| 211874_s_at  | MYST histone acetyltransferase (monocytic leukemia) 4                                             | MYST4    | 10q22.2       | 2.646 |
| 235761_at    | CDNA FLJ36553 fis, clone TRACH2008478                                                             |          |               | 2.653 |
| 238457_at    | CDNA FLJ33029 fis, clone THYMU2000162                                                             |          |               | 2.681 |
| 211466_at    | nuclear factor I/B                                                                                | NFIB     | 9p24.1        | 2.703 |
| 243115_at    |                                                                                                   |          |               | 2.703 |



|              |                                                                                                                                                                                                                                                                                                                              |           |              |       |
|--------------|------------------------------------------------------------------------------------------------------------------------------------------------------------------------------------------------------------------------------------------------------------------------------------------------------------------------------|-----------|--------------|-------|
| 243634_at    | Hypothetical protein LOC201895                                                                                                                                                                                                                                                                                               | LOC201895 | 4p14         | 2.717 |
| 215169_at    | solute carrier family 35, member E2                                                                                                                                                                                                                                                                                          | SLC35E2   | 1p36.33      | 2.725 |
| 235199_at    | Transcribed locus, weakly similar to XP_513408.1 similar to origin recognition complex, subunit 1; origin recognition complex, subunit 1, <i>S. cerevisiae</i> , homolog-like; origin recognition complex 1; replication control protein 1; origin recognition complex, subunit 1 (yeast homolog)-like ... [Pan troglodytes] |           |              | 2.725 |
| 212736_at    | chromosome 16 open reading frame 45                                                                                                                                                                                                                                                                                          | C16orf45  | 16p13.11     | 2.747 |
| 243546_at    | Sestrin 3                                                                                                                                                                                                                                                                                                                    | SESN3     | 11q21        | 2.762 |
| 217077_s_at  | G protein-coupled receptor 51                                                                                                                                                                                                                                                                                                | GPR51     | 9q22.1-q22.3 | 2.786 |
| 242899_at    | Sestrin 3                                                                                                                                                                                                                                                                                                                    | SESN3     | 11q21        | 2.801 |
| 214920_at    | hypothetical protein LOC221981                                                                                                                                                                                                                                                                                               | LOC221981 | 7p21.3       | 2.817 |
| 215092_s_at  | nuclear factor of activated T-cells 5, tonicity-responsive                                                                                                                                                                                                                                                                   | NFAT5     | 16q22.1      | 2.817 |
| 224397_s_at  | ARG99 protein                                                                                                                                                                                                                                                                                                                | ARG99     | 12p11.22     | 2.833 |
| 238989_at    | C1GALT1-specific chaperone 1                                                                                                                                                                                                                                                                                                 | C1GALT1C1 | Xq24         | 2.890 |
| 200952_s_at  | cyclin D2                                                                                                                                                                                                                                                                                                                    | CCND2     | 12p13        | 2.915 |
| 219717_at    | hypothetical protein FLJ20280                                                                                                                                                                                                                                                                                                | FLJ20280  | 4p15.32      | 2.933 |
| 226035_at    | ubiquitin specific protease 31                                                                                                                                                                                                                                                                                               | USP31     | 16p12.1      | 2.941 |
| 203717_at    | dipeptidylpeptidase 4 (CD26, adenosine deaminase complexing protein 2)                                                                                                                                                                                                                                                       | DPP4      | 2q24.3       | 3.067 |
| 212570_at    | KIAA0830 protein                                                                                                                                                                                                                                                                                                             | KIAA0830  | 11q21        | 3.077 |
| 230708_at    | Prickle-like 1 ( <i>Drosophila</i> )                                                                                                                                                                                                                                                                                         | PRICKLE1  | 12q12        | 3.077 |
| 1556306_at   | Chromosome 7 unknown mRNA                                                                                                                                                                                                                                                                                                    |           |              | 3.096 |
| 204623_at    | trefoil factor 3 (intestinal)                                                                                                                                                                                                                                                                                                | TFF3      | 21q22.3      | 3.185 |
| 211679_x_at  | G protein-coupled receptor 51                                                                                                                                                                                                                                                                                                | GPR51     | 9q22.1-q22.3 | 3.247 |
| 243584_at    | Transcribed locus, weakly similar to NP_060190.1 signal-transducing adaptor protein-2 [ <i>Homo sapiens</i> ]                                                                                                                                                                                                                |           |              | 3.247 |
| 1558117_s_at | ubiquitin specific protease 31                                                                                                                                                                                                                                                                                               | USP31     | 16p12.1      | 3.268 |
| 223940_x_at  | metastasis associated lung adenocarcinoma transcript 1 (non-coding RNA)                                                                                                                                                                                                                                                      | MALAT1    | 11q13.1      | 3.289 |
| 223796_at    | contactin associated protein-like 3                                                                                                                                                                                                                                                                                          | CNTNAP3   | 9p13.1       | 3.322 |
| 227510_x_at  | PRO1073 protein                                                                                                                                                                                                                                                                                                              | PRO1073   | 11cen-q12.3  | 3.356 |
| 205698_s_at  | mitogen-activated protein kinase kinase 6                                                                                                                                                                                                                                                                                    | MAP2K6    | 17q24.3      | 3.448 |
| 236583_at    | Transcribed locus                                                                                                                                                                                                                                                                                                            |           |              | 3.448 |
| 226065_at    | prickle-like 1 ( <i>Drosophila</i> )                                                                                                                                                                                                                                                                                         | PRICKLE1  | 12q12        | 3.521 |
| 227058_at    | hypothetical protein FLJ14834                                                                                                                                                                                                                                                                                                | FLJ14834  | 13q12.3      | 3.650 |
| 230008_at    | hypothetical protein LOC221981                                                                                                                                                                                                                                                                                               | LOC221981 | 7p21.3       | 3.774 |
| 224568_x_at  | metastasis associated lung adenocarcinoma transcript 1 (non-coding RNA)                                                                                                                                                                                                                                                      | MALAT1    | 11q13.1      | 3.817 |
| 235763_at    | hypothetical protein MGC34032                                                                                                                                                                                                                                                                                                | MGC34032  | 1p31.1       | 3.968 |
| 213488_at    | sushi, nidogen and EGF-like domains 1                                                                                                                                                                                                                                                                                        | SNED1     | 2q37.3       | 4.032 |
| 244065_at    | similar to cell recognition molecule CASPR3                                                                                                                                                                                                                                                                                  | LOC389734 | 9p13.1       | 4.367 |
| 236361_at    | UDP-N-acetyl-alpha-D-galactosamine:polypeptide N-acetylgalactosaminyltransferase-like 2                                                                                                                                                                                                                                      | GALNTL2   | 3p25.1       | 4.608 |

|             |                                                                                         |         |              |        |
|-------------|-----------------------------------------------------------------------------------------|---------|--------------|--------|
| 239262_at   | CDNA FLJ26242 fis, clone DMC00770                                                       |         |              | 4.950  |
| 225123_at   | Sestrin 3                                                                               | SESN3   | 11q21        | 5.155  |
| 222862_s_at | adenylate kinase 5                                                                      | AK5     | 1p31         | 5.263  |
| 219308_s_at | adenylate kinase 5                                                                      | AK5     | 1p31         | 5.882  |
| 239461_at   | UDP-N-acetyl-alpha-D-galactosamine:polypeptide N-acetylgalactosaminyltransferase-like 2 | GALNTL2 | 3p25.1       | 5.952  |
| 206093_x_at | tenascin XB                                                                             | TNXB    | 6p21.3       | 6.329  |
| 209990_s_at | G protein-coupled receptor 51                                                           | GPR51   | 9q22.1-q22.3 | 6.757  |
| 235683_at   | sestrin 3                                                                               | SESN3   | 11q21        | 6.757  |
| 235150_at   | Sestrin 3                                                                               | SESN3   | 11q21        | 7.463  |
| 205258_at   | inhibin, beta B (activin AB beta polypeptide)                                           | INHBB   | 2cen-q13     | 8.475  |
| 219452_at   | dipeptidase 2                                                                           | DPEP2   | 16q22.1      | 8.696  |
| 236383_at   | Transcribed locus                                                                       |         |              | 9.346  |
| 219059_s_at | extracellular link domain containing 1                                                  | XLKD1   | 11p15        | 12.610 |
| 220037_s_at | extracellular link domain containing 1                                                  | XLKD1   | 11p15        | 12.760 |
| 205392_s_at | chemokine (C-C motif) ligand 14                                                         | CCL14   | 17q11.2      | 45.250 |

**Table S2.** Affymetrix Mouse 430 GeneChip array data showing transcripts in MDLECs up- or down-regulated by a factor of at least twofold ( $P < 0.1$ ) after stimulation with TNF- $\alpha$ .

| Probe set ID | Gene title                                                                            | Gene symbol | Fold up-regulation |
|--------------|---------------------------------------------------------------------------------------|-------------|--------------------|
| 1419135_at   | lymphotoxin B                                                                         | ltb         | 40.82              |
| 1417256_at   | matrix metalloproteinase 13                                                           | Mmp13       | 35.76              |
| 1450174_at   | protein tyrosine phosphatase, receptor type, T                                        | Ptprt       | 29.50              |
| 1419534_at   | oxidized low density lipoprotein (lectin-like) receptor 1                             | Olr1        | 26.60              |
| 1422029_at   | chemokine (C-C motif) ligand 20                                                       | CCL20       | 22.92              |
| 1421408_at   | immunoglobulin superfamily, member 6                                                  | Igsf6       | 22.22              |
| 1427381_at   | immune-responsive gene 1                                                              | Irg1        | 21.78              |
| 1450193_at   | hyperpolarization-activated, cyclic nucleotide-gated K <sup>+</sup> 1                 | Hcn1        | 21.71              |
| 1427665_a_at | transcription factor NF                                                               | Nfic        | 21.38              |
| 1436482_a_at | syndecan 3                                                                            | Sdc3        | 20.85              |
| 1435012_x_at | elastase 3B, pancreatic                                                               | Ela3b       | 20.40              |
| 1430598_at   | cAMP responsive element modulator                                                     | Crem        | 20.00              |
| 1416246_a_at | Similar to coronin, actin binding protein 1A,                                         | Coro1A      | 19.07              |
| 1450829_at   | tumor necrosis factor, alpha-induced protein 3                                        | Tnfaip3     | 18.79              |
| 1421228_at   | chemokine (C-C motif) ligand 7                                                        | CCL7        | 18.57              |
| 1450826_a_at | serum amyloid A 3                                                                     | Saa3        | 17.89              |
| 1419697_at   | chemokine (C-X-C motif) ligand 11                                                     | CXCL11      | 16.80              |
| 1415803_at   | chemokine (C-X3-C motif) ligand 1                                                     | CX3CL1      | 16.16              |
| 1449473_s_at | tumor necrosis factor receptor superfamily, member 5                                  | Tnfrsf5     | 16.08              |
| 1420591_at   | G protein-coupled receptor 84                                                         | Gpr84       | 15.84              |
| 1418666_at   | pentaxin related gene                                                                 | Ptx3        | 14.12              |
| 1450093_s_at | leukemialymphoma related factor                                                       | Lrf         | 13.20              |
| 1420450_at   | matrix metalloproteinase 10                                                           | Mmp10       | 11.95              |
| 1422562_at   | Ras-related associated with diabetes                                                  | Rrad        | 11.66              |
| 1421274_at   | Src homology domain 2 containing protein                                              |             | 11.50              |
| 1432829_at   | enolase 1                                                                             | Eno 1       | 11.44              |
| 1418945_at   | matrix metalloproteinase 3                                                            | Mmp3        | 11.27              |
| 1419604_at   | umor stroma and activated macrophage protein                                          | DLM-1       | 10.47              |
| 1418471_at   | placental growth factor                                                               | Pgf         | 10.41              |
| 1449227_at   | cholesterol 25-hydroxylase                                                            | Ch25h       | 9.93               |
| 1420331_at   | C-type lectin, superfamily member 9                                                   | Clecsf9     | 9.78               |
| 1417314_at   | histocompatibility 2, complement component factor B                                   | H2-Bf       | 9.71               |
| 1448961_at   | phospholipid scramblase 2                                                             | Plscr2      | 9.24               |
| 1420697_at   | cAMP inducible gene 1                                                                 | Ci1         | 9.15               |
| 1426175_a_at | mast cell protease 7                                                                  | mMCP-7      | 8.81               |
| 1422914_at   | trans-acting transcription factor 5                                                   | Sp5         | 8.53               |
| 1417130_s_at | angiopoietin-like 4                                                                   | Angptl4     | 8.38               |
| 1427683_at   | early growth response 2                                                               | Egr2        | 8.24               |
| 1417813_at   | nhibitor of kappaB kinase epsilon                                                     | Ikbke       | 8.17               |
| 1424067_at   | intercellular adhesion molecule 1                                                     | ICAM1       | 8.00               |
| 1422937_at   | frizzled homolog 5 (Drosophila)                                                       | Fzd5        | 7.77               |
| 1422262_a_at | LIM homeobox protein 6                                                                | Lhx6        | 7.28               |
| 1426037_a_at | retinally abundant regulator of G-protein signaling                                   | mRGS-r      | 7.16               |
| 1434774_at   | Moderately similar to I49469 epidermal growth factor receptor-related protein - mouse |             | 7.10               |

|              |                                                                    |                |      |
|--------------|--------------------------------------------------------------------|----------------|------|
| 1451314_a_at | vascular adhesion molecule 1                                       | VCAM1          | 7.02 |
| 1419417_at   | vascular endothelial growth factor C                               | Vegfc          | 6.72 |
| 1451452_a_at | RGS-r                                                              | Rgs16          | 6.55 |
| 1429527_a_at | phospholipid scramblase 1                                          | Plscr1         | 6.46 |
| 1449984_at   | chemokine (C-X-C motif) ligand 2                                   | CXCL2          | 6.34 |
| 1448162_at   | vascular adhesion molecule 1                                       | VCAM1          | 6.28 |
| 1423104_at   | insulin receptor substrate 1                                       | Irs1           | 6.13 |
| 1421994_a_at | HS1 binding protein 3                                              | Hs1bp3-pending | 6.06 |
| 1425837_a_at | Nocturnin                                                          | Nocturnin      | 6.00 |
| 1421712_at   | selectin, endothelial cell                                         | Sele           | 5.98 |
| 1449195_s_at | C-X-C chemokine ligand 16                                          | CXCL16         | 5.74 |
| 1418930_at   | chemokine (C-X-C motif) ligand 10                                  | CXCL10         | 5.59 |
| 1418126_at   | chemokine (C-C motif) ligand 5                                     | CCL5           | 5.37 |
| 1448710_at   | CXCR-4                                                             | CXCR4          | 4.55 |
| 1420380_at   | chemokine (C-C motif) ligand 2                                     | CCL2           | 4.49 |
| 1435906_x_at | guanylate nucleotide binding protein 2                             | GBP2           | 4.10 |
| 1420549_at   | guanylate nucleotide binding protein 1                             | GBP1           | 3.69 |
| 1425253_a_at | mucosal vascular addressin cell adhesion molecule 1                | Madcam1        | 3.20 |
| 1416273_at   | tumor necrosis factor, alpha-induced protein 2                     | Tnfaip2        | 2.91 |
| 1417936_at   | chemokine (C-C motif) ligand 9                                     | CCL9           | 2.89 |
| 1418099_at   | tumor necrosis factor I receptor                                   | TNFR1          | 2.88 |
| 1415989_at   | vascular adhesion molecule 1                                       | VCAM1          | 2.75 |
| 1425811_a_at | cysteine rich protein                                              | Csrp           | 2.52 |
| 1460642_at   | nf receptor associated factor 4                                    | Traf4          | 2.51 |
| 1418991_at   | BCL2-antagonistkiller 1                                            | Bak1           | 2.50 |
| 1460629_at   | tripartite motif protein 16                                        | Trim16         | 2.50 |
| 1415877_at   | dihydropyrimidinase-like 3                                         | Dpysl3         | 2.49 |
| 1423721_at   | tropomyosin 1                                                      | Tmp1           | 2.49 |
| 1419168_at   | mitogen-activated protein kinase 6                                 | Mapk6          | 2.48 |
| 1449368_at   | decorin                                                            | Dcn            | 2.48 |
| 1456333_a_at | Rho GTPase activating protein 6                                    | Arhgap6        | 2.47 |
| 1420904_at   | interleukin 17 receptor                                            | Il17R          | 2.46 |
| 1425154_a_at | colony stimulating factor 1 (macrophage)                           | Csf1           | 2.44 |
| 1418349_at   | heparin binding epidermal growth factor-like growth factor (Hegfl) | Hegfl          | 2.43 |
| 1439364_a_at | matrix metalloproteinase 2                                         | Mmp2           | 2.38 |
| 1433782_at   | Highly similar to CLDC_HUMAN CLAUDIN-12                            |                | 2.32 |
| 1418587_at   | nf receptor associated factor 3                                    | Traf3          | 2.26 |
| 1448898_at   | chemokine (C-C motif) ligand 9                                     | CCL9           | 2.24 |
| 1433781_a_at | Highly similar to CLDC_HUMAN CLAUDIN-12                            |                | 2.18 |
| 1416136_at   | matrix metalloproteinase 2                                         | Mmp2           | 2.16 |

| Probe set id | Gene Title                      | Gene Symbol | Fold down-regulation |
|--------------|---------------------------------|-------------|----------------------|
| 1416676_at   | kininogen                       | Kng         | 42.83                |
| 1448873_at   | occludin                        | Ocln        | 42.35                |
| 1449563_at   | contactin                       | Cntn1       | 42.20                |
| 1419188_s_at | chemokine (C-C motif) ligand 27 | CCL27       | 24.69                |
| 1421855_at   | fibrinogen-like protein 2       | Fgl2        | 24.58                |
| 1423294_at   | mesoderm specific transcript    | Mest        | 22.53                |
| 1421441_at   | angiopoietin                    | Agpt        | 19.88                |

|              |                                                                                              |             |       |
|--------------|----------------------------------------------------------------------------------------------|-------------|-------|
| 1451440_at   | c-type lectin protein MT75                                                                   | Chodl       | 16.56 |
| 1420929_at   | catenin alpha-like 1                                                                         | Catnal1     | 10.75 |
| 1415871_at   | transforming growth factor, beta induced                                                     | tgfbi       | 10.51 |
| 1416357_a_at | melanoma cell adhesion molecule                                                              | Mcam        | 10.14 |
| 1420930_s_at | catenin alpha-like 1                                                                         | Catnal1     | 10.12 |
| 1416194_at   | cytochrome P450, subfamily IV B, polypeptide 1                                               | Cyp4b1      | 9.83  |
| 1448752_at   | carbonic anhydrase 2                                                                         | Car2        | 9.47  |
| 1417290_at   | leucine-rich alpha-2-glycoprotein                                                            | Lrg-pending | 8.86  |
| 1423594_a_at | endothelin receptor type B                                                                   | Ednrb       | 8.05  |
| 1422561_at   | a disintegrin-like and metalloprotease(reprolysin type) with thrombospondin type 1 motif, 5  | adamts5     | 7.52  |
| 1448152_at   | insulin-like growth factor 2                                                                 | Igf2        | 7.21  |
| 1416203_at   | Aquaporin 1                                                                                  | Aqp1        | 7.13  |
| 1426314_at   | endothelin receptor type B                                                                   | Ednrb       | 6.79  |
| 1451838_a_at | Tac2-N                                                                                       | Tac2-N      | 6.68  |
| 1450658_at   | a disintegrin-like and metalloprotease (reprolysin type) with thrombospondin type 1 motif, 5 | adamts5     | 6.39  |
| 1450658_at   | a disintegrin-like and metalloprotease (reprolysin type) with thrombospondin type 1 motif, 5 | adamts5     | 6.39  |
| 1418058_at   | ETL1                                                                                         | ETL1        | 6.15  |
| 1418322_at   | cAMP responsive element modulator                                                            | Crem        | 5.95  |
| 1437401_at   | insulin-like growth factor 1                                                                 | Igf1        | 5.79  |
| 1456250_x_at | transforming growth factor, beta induced                                                     | tgfbi       | 5.18  |
| 1449037_at   | cAMP responsive element modulator                                                            | Crem        | 4.73  |
| 1417839_at   | Claudin 5                                                                                    | Cldn5       | 3.60  |
| 1434962_x_at | chemokine (C-C motif) ligand 27                                                              | CCL27       | 3.36  |
| 1417678_at   | matrix metalloproteinase 24                                                                  | Mmp24       | 3.25  |
| 1450104_at   | a disintegrin and metalloprotease domain 10                                                  | adam10      | 2.82  |
| 1417266_at   | chemokine (C-C motif) ligand 6                                                               | CCL6        | 2.11  |
| 1450105_at   | a disintegrin and metalloprotease domain 10                                                  | adam10      | 2.09  |
| 1418486_at   | vanin 1                                                                                      | Vnn1        | 1.66  |
| 1429379_at   | extra cellular link domain-containing 1                                                      | LYVE-1      | 1.56  |
